# Supplementary material
Source: PubMed Central journal article supplement (PMC6274645)
Supplement: 41422_2018_115_MOESM1_ESM.pdf [file 41422_2018_115_MOESM1_ESM.pdf]

## Supplementary information

### Methods and Materials

#### **ToCsm effector complex cloning, expression and purification**

The cDNA encoding *ToCas6-ToCsm5* (Ton\_0892-0897) and crRNA template were chemically synthesized. The crRNA template and *ToCas6* genes were cloned into the NcoI/SalI and the NdeI/KpnI sites of the pCDFDuet-1 vector, respectively. The *ToCsm1* and *ToCsm4* genes were cloned into the NcoI/SalI and the NdeI/KpnI sites of the pACYCDuet-1 vector respectively. The *ToCsm3* gene was inserted into the NcoI/SalI sites of pETDuet-1, and the *ToCsm2-ToCsm5* genes were inserted into the HindIII/SalI and the NdeI/XhoI sites of pRSFDuet-1, respectively. *ToCsm2* carries a 6×His-tag at its N-terminus.

Sequence of crRNA template: (from 5' to 3', 5'-handle is marked by shadow, spacer sequence is underlined)

GTTCCAGTAGGACAGAATTGTGTGGAAAGTGGCCCGAAACCCTTCCGGG  
AGAGTGAGGACCCTCGAGTTCCAGTAGGACAGAATTGTGTGGAAAGTGG  
CCCGAAACCCTTCCGGGAGAGTGAGGACCCTCGAGTTCCAGTAGGACAG  
AATTGTGTGGAAAGTGGCCCGAAACCCTTCCGGGAGAGTGAGGACCCTC  
GAGTTCCAGTAGGACAGAATTGTGTGGAAAGTGGCCCGAAACCCTTCCG  
GGAGAGTGAGGACCCTCGAGTTCCAGTAGGACAGAATTGTGTGGAAAGT  
GGCCCGAAACCCTTCCGGGAGAGTGAGGACCCTCGAGTTCCAGTAGGAC  
AGAATTGTGTGGAAAG

The *ToCsm* effector complex was produced in 6L of *E. coli* strain BL21 (DE3) at 37 °C by induction with 0.5 mM IPTG (isopropyl-β-d-thiogalactoside) for 5 h. The *E. coli* cells were harvested and lysed. The lysate was incubated in a hot water bath at 70 °C for 10 min and on ice for another 10 min to precipitate *E. coli* proteins. Then the lysate was clarified by ultracentrifugation at 32,000× g for 40 min and purified on a nickel-affinity column containing 5 mL Chelating Sepharose Fast Flow matrix (GE Healthcare). Gel filtration was performed as the final step of purification, using a

Superdex 200 10/300 GL column (GE Healthcare) in a buffer containing 50 mM Tris–HCl (pH 8.0), 500 mM NaCl. The best fractions were collected and the *ToCsm* effector protein complex was concentrated to 3.6 mg/mL.

### ***ToCsm* effector complex Cryo-EM sample preparation, data acquisition and structure determination**

The 3.6 mg/mL *ToCsm* complex was diluted to 0.5 mg/mL in buffer containing 25 mM Tris–HCl (pH 8.0), 220 mM NaCl, 4 mM DTT. Cryo-EM grids were frozen using a Vitrobot Mark IV (FEI) as follows: 5  $\mu$ L of the sample was applied to a glow-discharged Quantifoil R1.2/1.3 holey carbon 300 mesh gold grid, blotted for 5–6 s in 70% humidity at 16 °C, and plunge frozen in liquid ethane cooled by liquid nitrogen.

Cryo-EM data were recorded on a Titan Krios (FEI) operated at 300 kV, equipped with a Gatan K2 Summit camera. SerialEM was used for automated data collection. Movies were collected at a nominal magnification of 22,500 $\times$  in super-resolution mode resulting in a calibrated pixel size of 1.04  $\text{\AA}$ /pixel, with a defocus range of approximately -1.8 to -2.5  $\mu$ m. 32 frames were recorded with a total dose of  $\sim 60 \text{ e}^- \text{\AA}^{-2}$ .

1,678 Movie frames were recorded. Beam-induced drift was corrected using MOTIONCORR2<sup>1</sup>. The contrast transfer function parameters of micrographs were estimated by Gctf<sup>2</sup>. Particles were picked by Gautomatch<sup>3</sup>. About 665k particles were collected in total, of which,  $\sim 322$ k are good enough for the 3D classification in Relion<sup>4</sup>. Apart from the rubbish class ( $\sim 13\%$  particles), two major classes were separated after the 3D classification. The dominant class ( $\sim 50\%$  particles) is the intact *ToCsm* complex. To further improve the reconstruction resolution of the intact complex, a second cycle of 3D classification and various combinations of reconstruction with particles from different classes (the second cycle 3D classification) were performed. Finally, the sole class (group I,  $\sim 10\%$  particles) yielded the best resolution (4.33  $\text{\AA}$ , better than others, using the bin2 data), was used for the final

reconstruction (3.35 Å with the unbinned data). Another class (~37% particles) constitutes an incomplete complex, which lacks the subunit of Csm2 (N-terminal 6×His-tag), possibly due to the degradation or dissociation of Csm2 during the Cryo-EM sample preparation. The resolution was 3.35 Å based on gold-standard Fourier shell correlation (FSC) =0.143 cutoff criterion<sup>5</sup>. Local resolution analysis was performed by ResMap<sup>6</sup>.

### ***ToCsm* effector complex Model building**

The 3.35 Å density map was of sufficient quality for atomic model building. Briefly, crystal structures of *ToCsm1* and *ToCsm5* were fitted to the Cryo-EM density of *ToCsm* effector complex as a rigid body. Atomic models of *ToCsm2*, *ToCsm3* and *ToCsm4* were built *de novo* into density with the structures of their homologues as a guide using COOT<sup>7</sup>. The *ToCsm* effector complex was finally refined using real-space refinement implemented in PHENIX<sup>8</sup>. All images of the model were created using PyMOL ([www.pymol.org](http://www.pymol.org)).

### ***ToCsm1* cloning, expression and purification**

*ToCsm1* was cloned into a pET24a vector with a C-terminal 6×His-tag. The recombinant protein was expressed in *E. coli* Rosetta (DE3) strains in LB broth containing 50 µg/mL of kanamycin and 34 µg/mL of chloramphenicol. The *E. coli* cells were grown to an OD600 of 0.8, then protein expression was induced with 0.3 mM IPTG for 16 h at 16 °C. The cells were pelleted, resuspended in buffer containing 50 mM Tris-HCl (pH8.0), 300 mM NaCl and 20 mM imidazole, and lysed in a high-pressure cell disruptor. The supernatant was clarified by centrifugation (16,000 rpm for 40 min at 4 °C). The protein was first purified by a nickel-affinity column. The eluate from the nickel-affinity column was dialyzed against 50 mM Tris-HCl (pH 8.0) and 100 mM NaCl. After this, the dialyzed sample was further purified using Heparin HP, Resource Q, and Superdex200 10/300 GL columns with a FPLC system. The final elution buffer was 50 mM Tris-HCl (pH 8.0), 500 mM NaCl. The protein was

concentrated to 45 mg/mL and was flash-frozen in liquid nitrogen before stored at -80 °C.

### ***ToCsm1*<sub>crys</sub>-2ATP crystallization and data collection**

*ToCsm1* protein was diluted to 8 mg/mL, 2mM ATP was added before crystallization. The initial crystals of *ToCsm1* were obtained by vapor diffusion using a reservoir solution of 0.2 M MgCl<sub>2</sub>, 0.1 M tri-Na citrate pH 5.0 and 10% PEG 20000 at 16 °C. Through the extensive optimization of pH and precipitants, the qualities of crystals were further improved. The crystals were directly frozen in liquid nitrogen without additional cryoprotection. The X-ray diffraction data sets for *ToCsm1*<sub>crys</sub>-2ATP were collected at the Shanghai Synchrotron Radiation Facility beamline BL19U. The diffraction data were indexed, integrated and scaled using the HKL2000 program<sup>9</sup>. All images of the model were created using PyMOL ([www.pymol.org](http://www.pymol.org)).

### ***ToCsm1*<sub>crys</sub>-2ATP structural determination**

The structure of *ToCsm1*<sub>crys</sub>-2ATP was solved by the Molecular Replacement in the PHENIX program<sup>8</sup> using the crystal structure of apo-Csm1 from *T. onnurineus* as a search model. Further modeling of the structure was performed using the program COOT<sup>7</sup>, and then subject to refinement using the PHENIX program<sup>8</sup>.

### ***In vitro* synthesis of cyclic oligoadenylates (cOAs) and Mass Spectrometry analysis**

To identify the product generated by *ToCsm* effector complex, 500 nM *ToCsm* effector complex, 20 μM noncomplementary target RNA, 500 μM ATP and 5mM NiSO<sub>4</sub> were incubated at 55 °C for 40 min in reaction buffer (25 mM Tris-HCl pH 8.0, 50 mM KCl). Reactions were stopped by heating to 95 °C for 10 min. The denatured protein was removed from the products by centrifugation for 15 min at 4 °C. The supernatant was analyzed by Mass Spectrometry at negative mode (MALDI-TOF/TOF Ultraflex<sup>TM</sup>, Bruker, Germany).

### ***In vitro* target RNA cleavage assay**

To identify the RNA cleavage activity of *ToCsm* effector complex, the *ToCsm* complex (15  $\mu$ M), unlabelled 38-nt target RNA substrate (13  $\mu$ M) and 8 mM MnCl<sub>2</sub> were incubated at 55 °C for 0, 5, 10 and 20 min in reaction buffer (25 mM Tris-HCl pH 8.0, 50 mM KCl). The reactions were stopped by the addition of 2 $\times$  formamide loading buffer (100% formamide, 0.01% bromophenol blue) followed by heating at 95 °C for 3 min. Then the samples were analyzed on denaturing Urea-PAGE.

### **Reference:**

- 1 Zheng, S. Q. *et al.* MotionCor2: anisotropic correction of beam-induced motion for improved cryo-electron microscopy. *Nat Methods* **14**, 331-332, doi:10.1038/nmeth.4193 (2017).
- 2 Zhang, K. Gctf: Real-time CTF determination and correction. *J Struct Biol* **193**, 1-12, doi:10.1016/j.jsb.2015.11.003 (2016).
- 3 Zhang, K. Gautomatch <https://www.mrc-lmb.cam.ac.uk/kzhang/Gautomatch/>. (2016).
- 4 Fernandez-Leiro, R. & Scheres, S. H. W. A pipeline approach to single-particle processing in RELION. *Acta Crystallogr D Struct Biol* **73**, 496-502, doi:10.1107/S2059798316019276 (2017).
- 5 Rosenthal, P. B. & Henderson, R. Optimal Determination of Particle Orientation, Absolute Hand, and Contrast Loss in Single-particle Electron Cryomicroscopy. *Journal of Molecular Biology* **333**, 721-745, doi:10.1016/j.jmb.2003.07.013 (2003).
- 6 Kucukelbir, A., Sigworth, F. J. & Tagare, H. D. Quantifying the local resolution of cryo-EM density maps. *Nat Methods* **11**, 63-65, doi:10.1038/nmeth.2727 (2014).
- 7 Emsley, P. & Cowtan, K. Coot: model-building tools for molecular graphics. *Acta Crystallogr. Sect. D* **60**, 2126–2132 (2004).
- 8 Adams, P. D. *et al.* PHENIX: a comprehensive Python-based system for macromolecular structure solution. *Acta Crystallogr D Biol Crystallogr* **66**, 213-221, doi:10.1107/S0907444909052925 (2010).
- 9 Z, O. & W., M. Processing of X-ray diffraction data collected in oscillation mode. *Methods Enzymol.* **276**, 307-326 (1997).

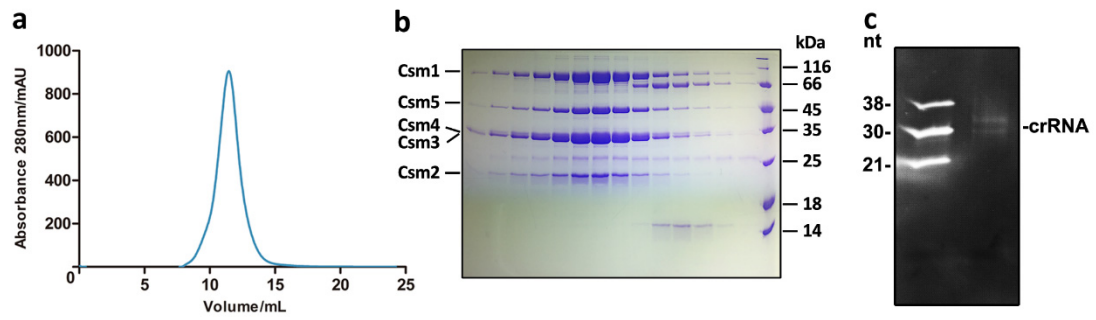

**Supplementary information, Fig. S1. Purification of *ToCsm* effector complex expressed from *E. coli*.** **a** *ToCsm* effector complex were fractionated by Superdex 200. **b** SDS-PAGE for protein composition analysis. Gels were stained with Coomassie brilliant blue. **c** Urea-PAGE for crRNA analysis.

**a**

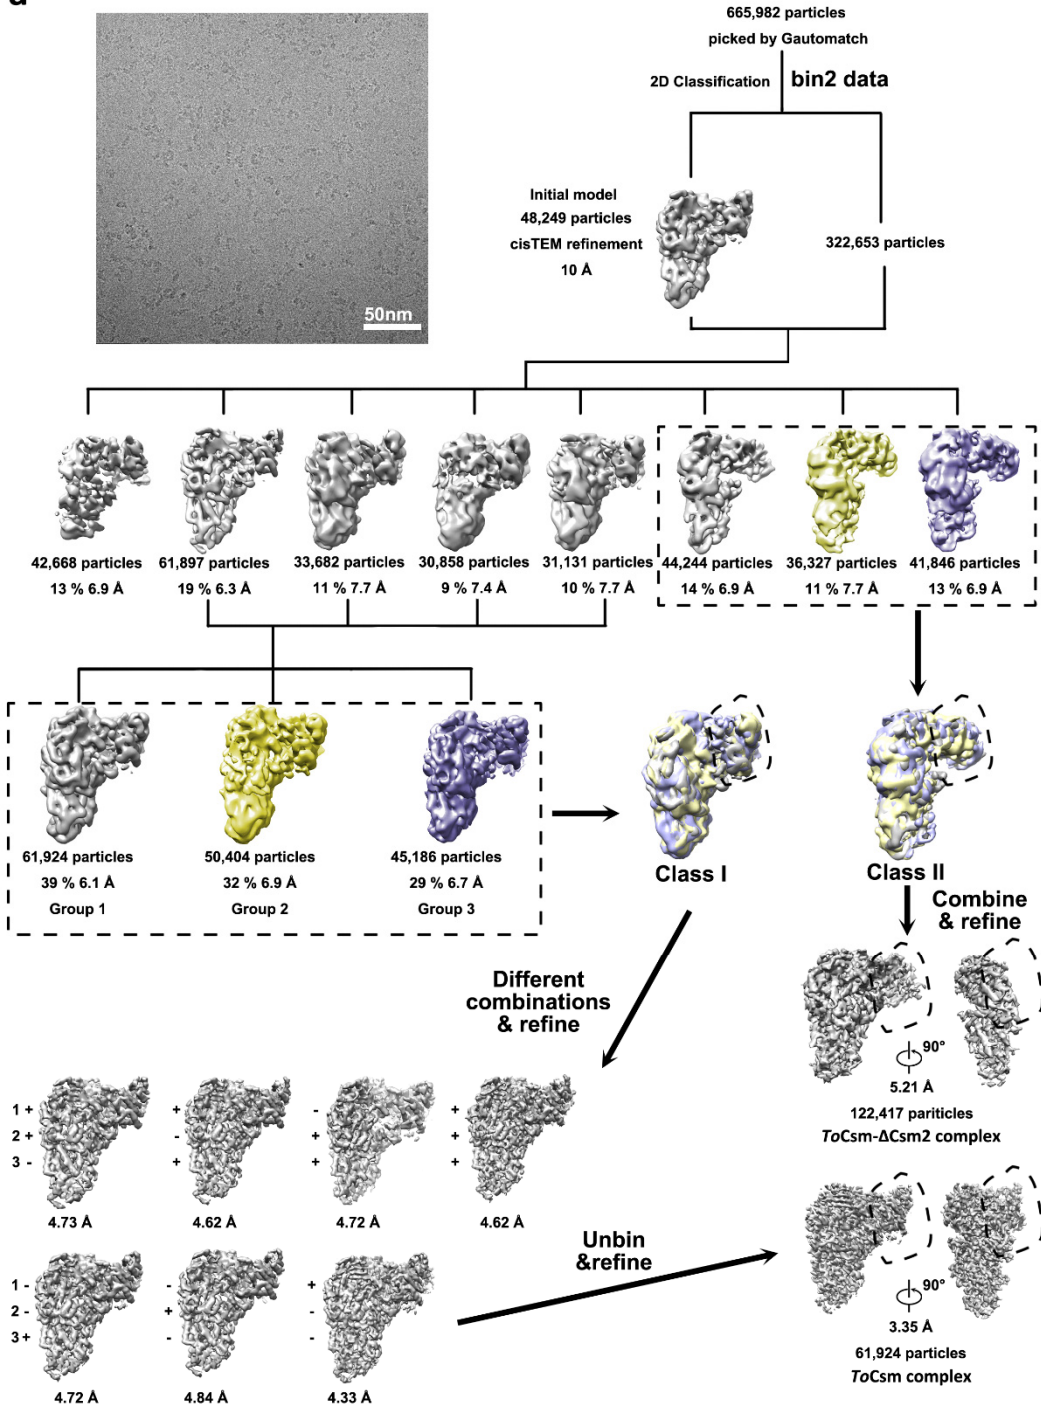

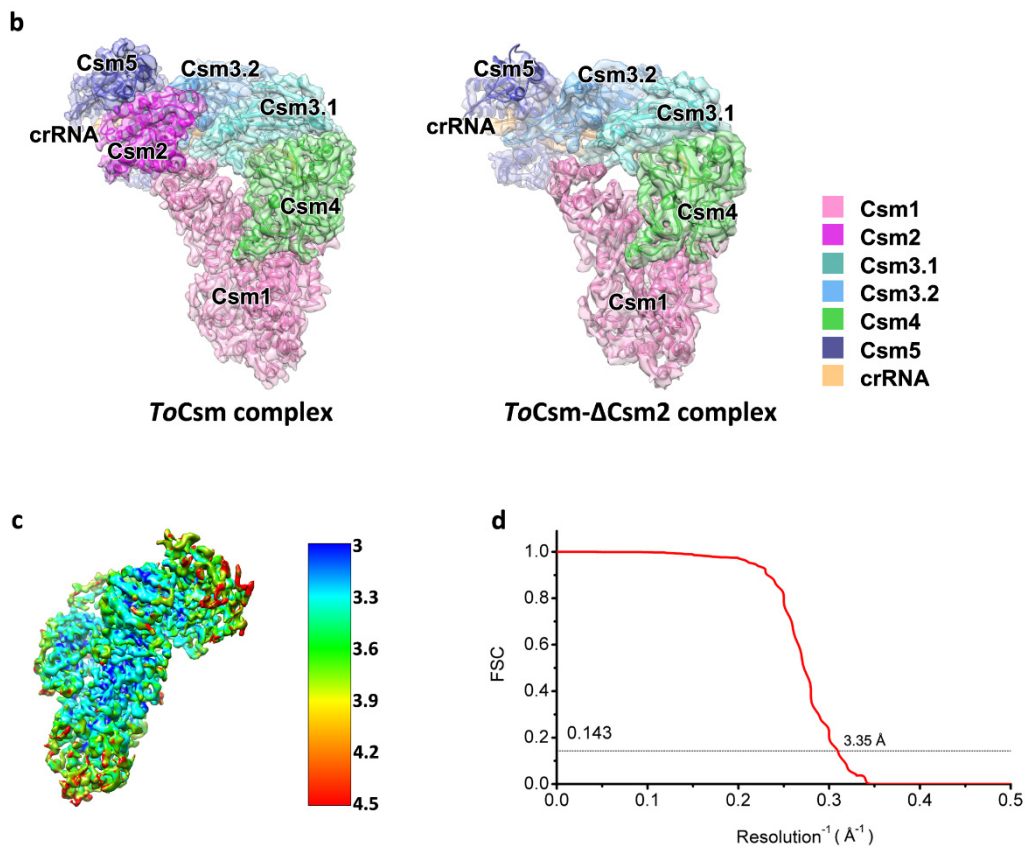

**Supplementary information, Fig. S2. Cryo-EM data processing and resolution evaluation.** **a, b** A representative micrograph of *ToCsm* effector complex and flow chart of Cryo-EM data processing. Apart from the rubbish class (~13% particles), two major classes were separated after the 3D classification. The dominant class (~50% particles) is the intact *ToCsm* complex. Another class (~37% particles) constitutes an incomplete complex, which lacks the subunit of Csm2 (*ToCsm- $\Delta$ Csm2* complex). **c** The final map local resolution variation was estimated with ResMap. **d** The gold standard Fourier shell correlation (FSC) curves of the final map. The resolution is 3.35 Å at FSC=0.143.



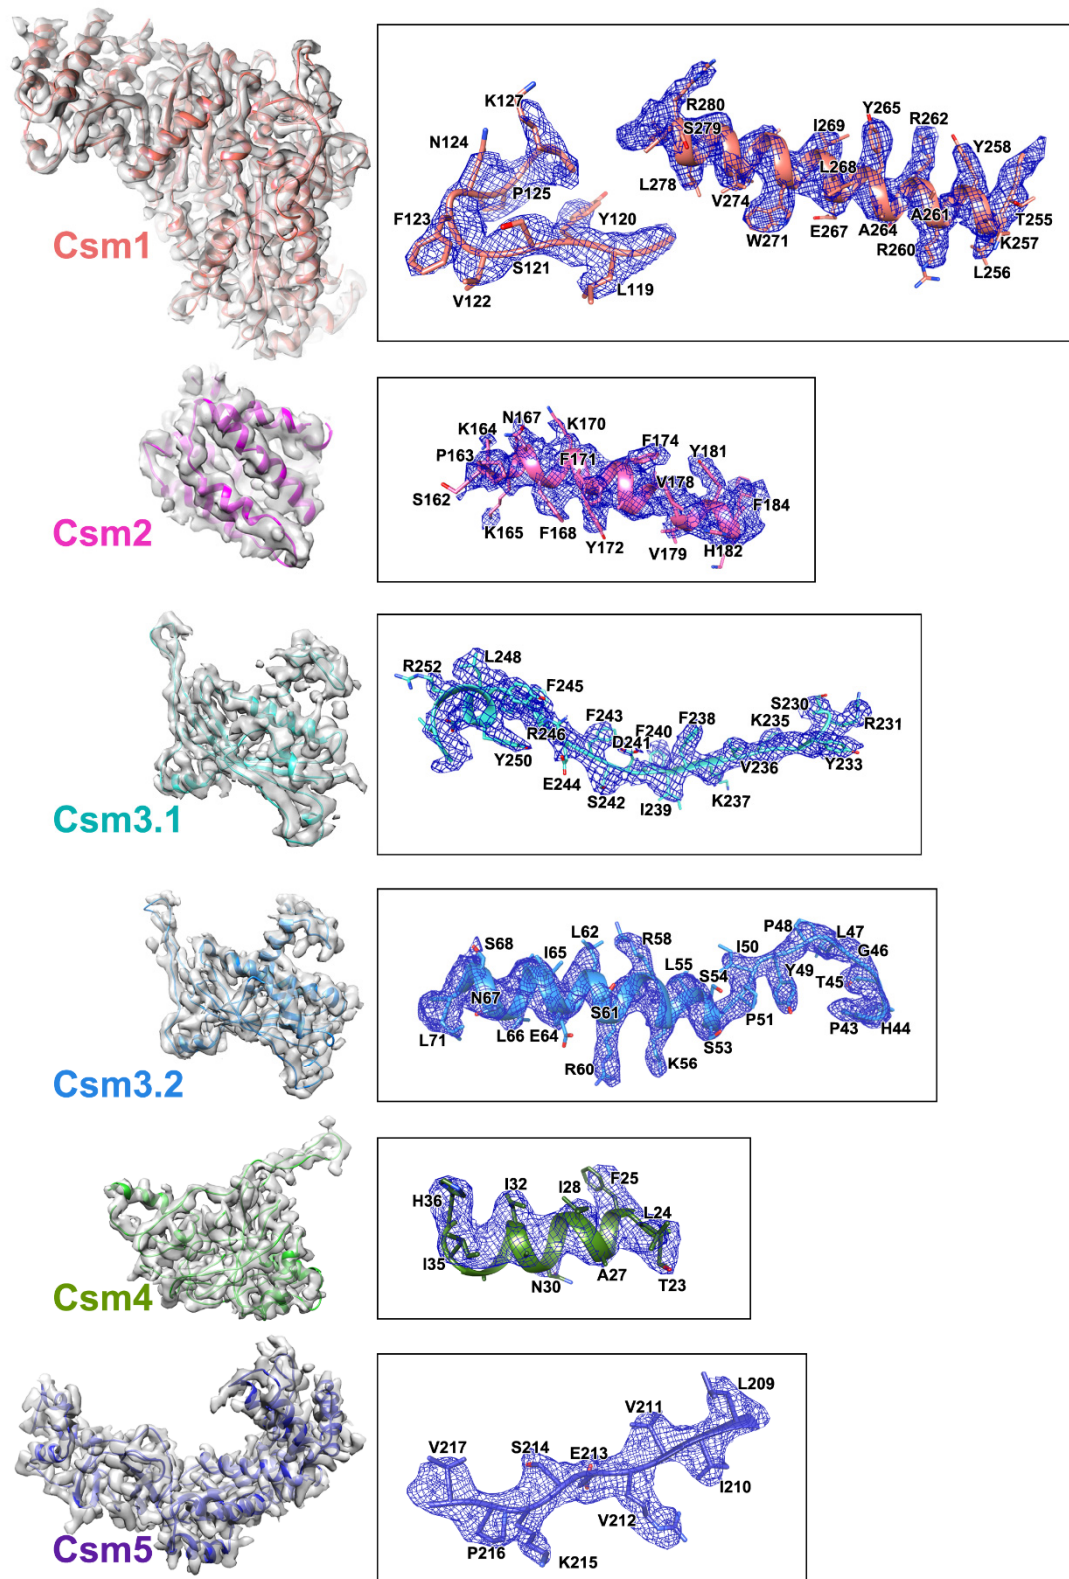

**Supplementary information, Fig. S3.** Typical electron density maps are shown overlaid with the corresponding model.

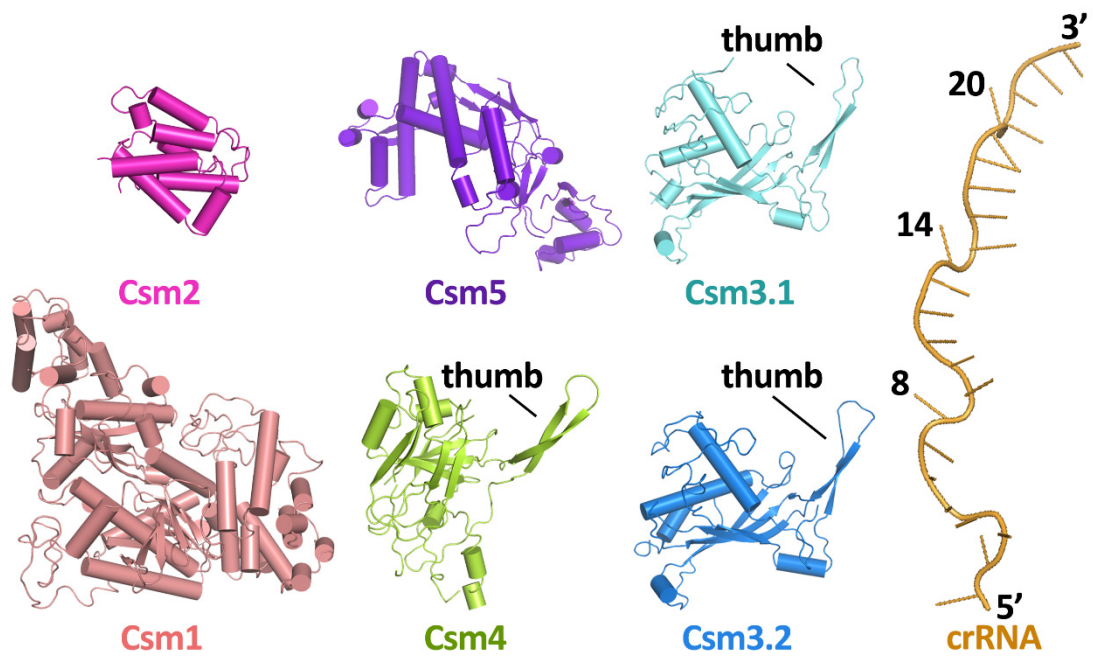

**Supplementary information, Fig. S4.** Structure of individual subunit in Cryo-EM *ToCsm* effector complex structure.

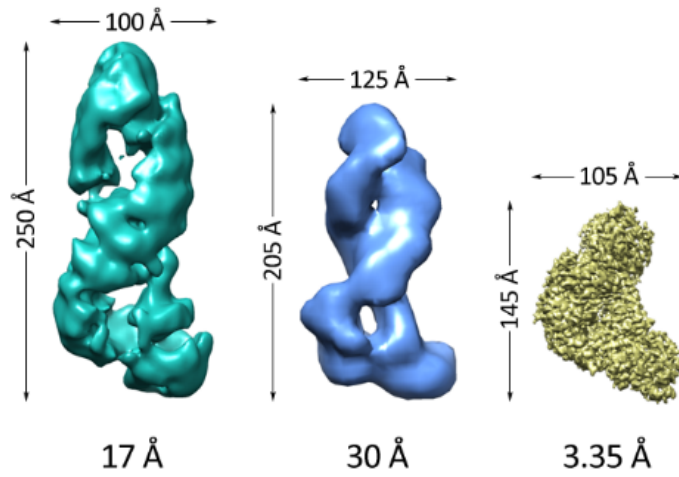

**Supplementary information, Fig. S5. Comparison of the EM structure of Csm complexes from different species.** *T. Thermophilus* (left), *S. Solfataricus* (middle), *T. onnurineus* (right). Height and width are shown to each Csm complex.

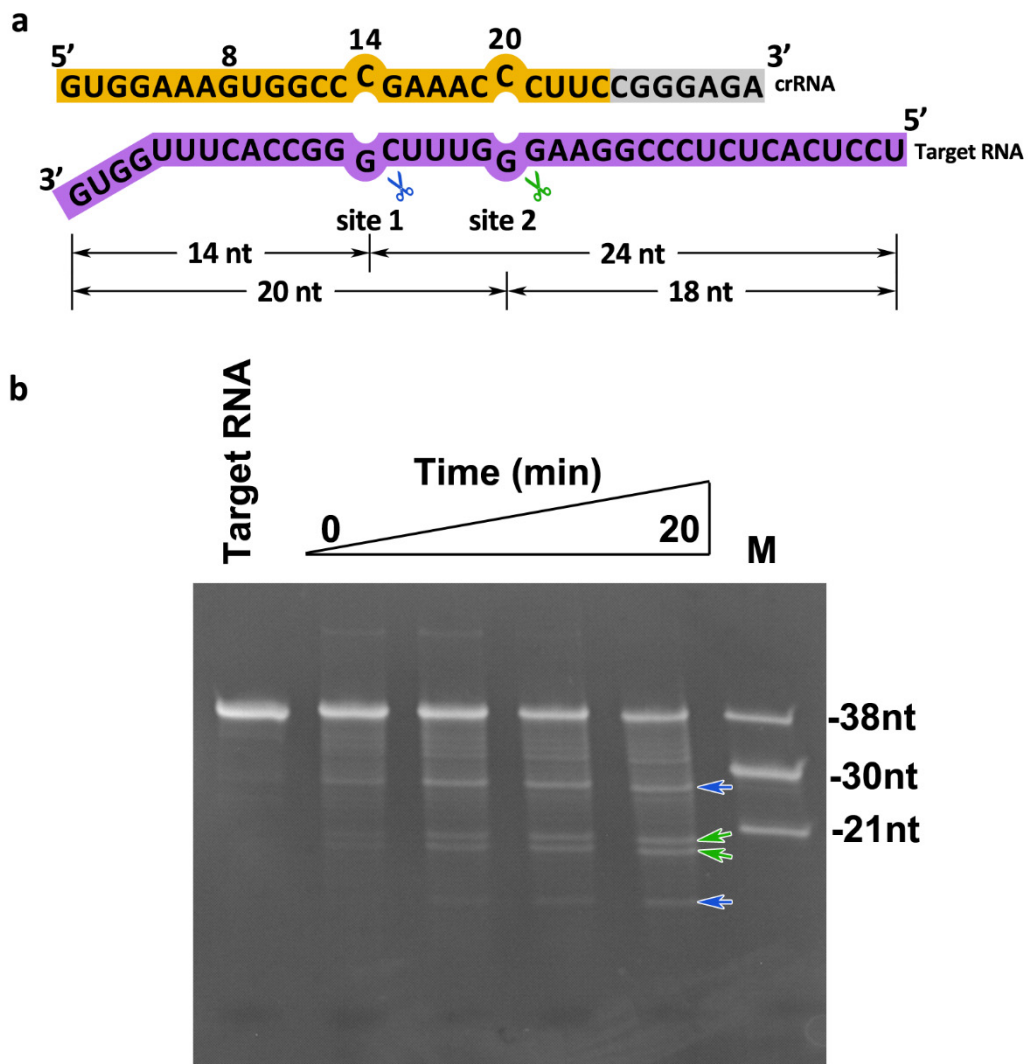

**Supplementary information, Fig. S6. Target RNA cleavage activity of *ToCsm* effector complex.** **a** Schematic representation of target RNA cleavage sites. The constructed 24-nt crRNA is colored in orange, the unconstructed flexible 3'-end of crRNA is shown in grey. **b** Cleavage of 38-nt unlabelled target RNA by the *ToCsm* effector complex in a time course (0, 5, 10, 20 min). Arrows indicate the cleaved fragments on a denaturing Urea-PAGE, corresponding to 24 nt/14 nt (site 1) and 18 nt/20 nt (site 2).

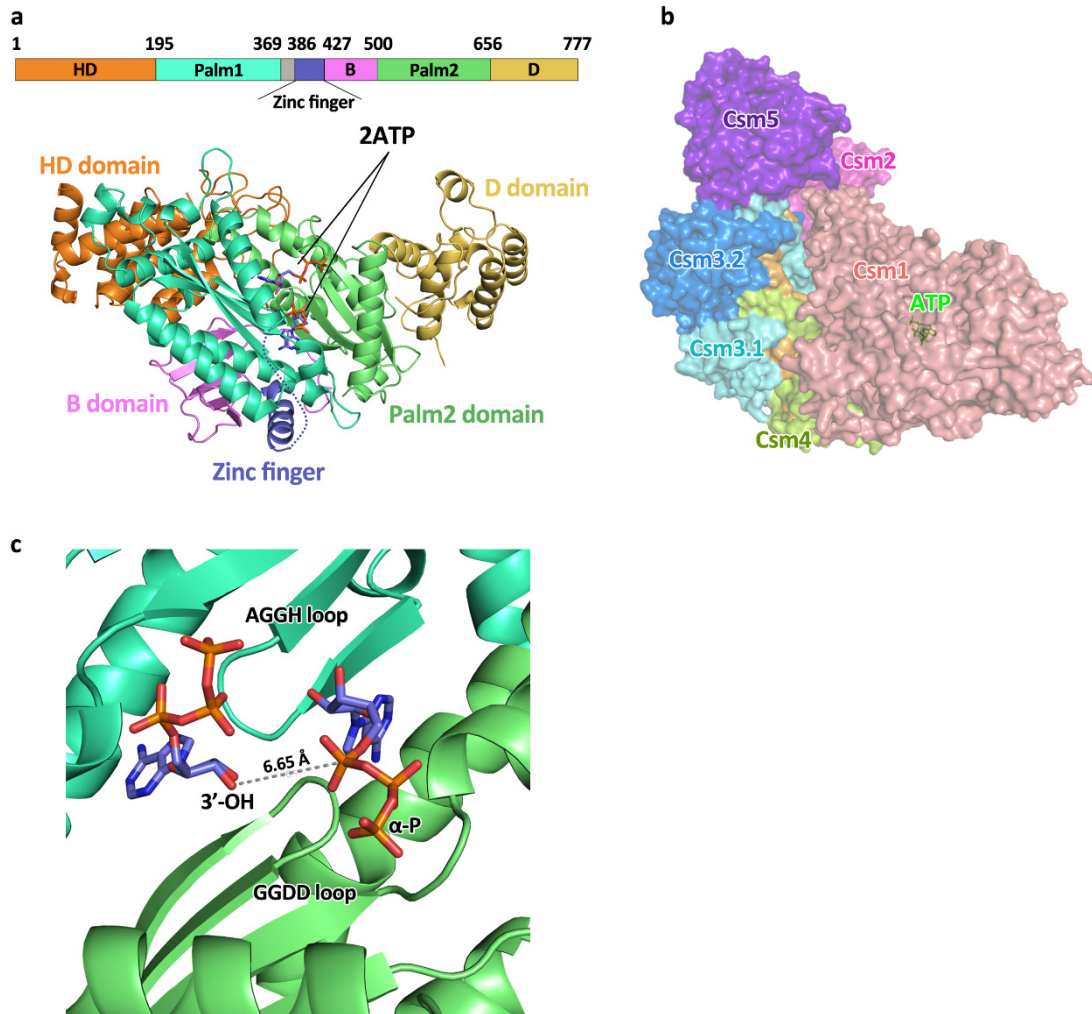

**Supplementary information, Fig. S7. ATP-binding site in *ToCsm1*<sub>crys</sub>-2ATP and *ToCsm* effector complex. **a** Domain arrangement of *ToCsm1* and crystal structure of *ToCsm1*<sub>crys</sub>-2ATP. The unstructured region is shown in grey. **b** Surface presentation of Cryo-EM structure of the *ToCsm* effector complex with one ATP molecule. **c** Close-up view of two ATP molecules in the *ToCsm1*<sub>crys</sub>-2ATP structure.**

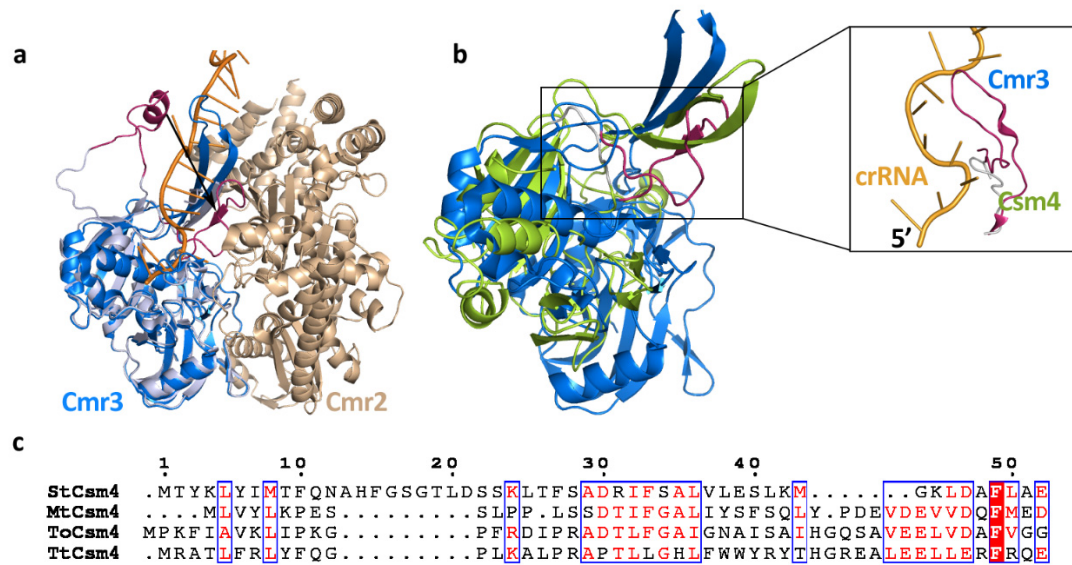

**Supplementary information, Fig. S8. Structural comparison and sequence alignment of *ToCsm1* with its orthologous.** **a** Structural comparison of *PfCmr3* with crRNA bound (PDB: 3X1L) and unbound (PDB: 3W2W) shows the loop (warpink, residues D10-S26) swinging a far distance to coordinate with crRNA. **b** Comparison of the loop in *ToCsm4* (gray) with that in *PfCmr3* (warpink, residues G13-D17) indicates the loop in *ToCsm4* is shorter. **c** Sequence alignment of *ToCsm4* with Csm4s from different species reported to be able to produce cOA<sub>4</sub>/cOA<sub>6</sub>.



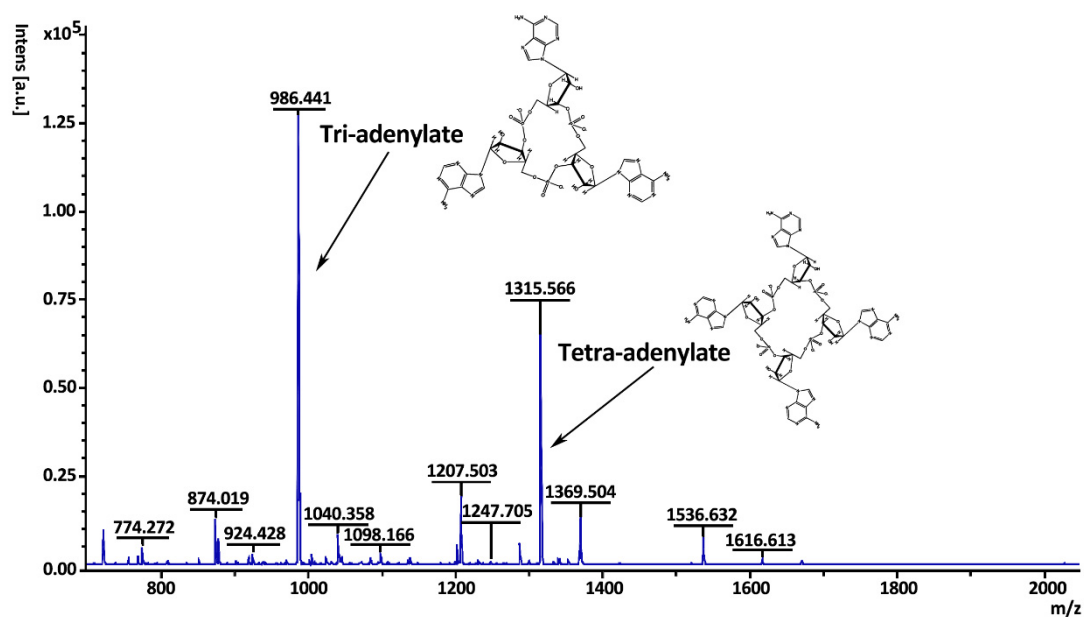

**Supplementary information, Fig. S9. MS analysis of ATP reaction products mediated by the *ToCsm* effector complex.** Both cOA<sub>3</sub> (Tri-adenylate) and cOA<sub>4</sub> (Tetra-adenylate) are the major products of the *in vitro* reaction, and there are no larger peaks corresponding to the size of cOA<sub>5</sub> or cOA<sub>6</sub>. The theoretical molecular weight of cOA<sub>3</sub>, cOA<sub>4</sub>, cOA<sub>5</sub> and cOA<sub>6</sub> are 987.158, 1316.210, 1645.263 and 1974.315, respectively.

,





**Supplementary information, Table S1. Cryo-EM Data collection and Refinement Statistics**

---

| <i>ToCsm</i> effector complex               |         |
|---------------------------------------------|---------|
| <b>Data collection and processing</b>       |         |
| Magnification                               | 22,500  |
| Voltage (kV)                                | 300     |
| Electron exposure (e-/Å <sup>2</sup> )      | 60      |
| Defocus range (µm)                          | 1.8-2.5 |
| Pixel size (Å)                              | 1.04    |
| Symmetry imposed                            | C1      |
| Initial particle image (no.)                | 665,982 |
| Final particle image (no.)                  | 61,924  |
| Map resolution (Å)                          |         |
| FSC threshold                               | 0.143   |
| Map resolution (Å)                          | 3.35    |
| <b>Refinement</b>                           |         |
| Initial model used (PDB code)               | NA      |
| FSC threshold                               | 0.143   |
| Model resolution (Å)                        | 3.35    |
| Model sharpening B factor (Å <sup>2</sup> ) | -90     |
| Model composition                           |         |
| Non-hydrogen atoms                          | 16,246  |
| Protein residues                            | 1,993   |
| Nucleotide                                  | 24      |
| Ligands                                     | ATP: 1  |
| R.m.s deviations                            |         |
| Bonds lengths (Å)                           | 0.008   |
| Bonds angles (°)                            | 1.047   |
| <b>Validation</b>                           |         |
| Clashscore                                  | 7.93    |
| Ramachandran plot                           |         |
| Favored region (%)                          | 85.65   |
| Allowed region (%)                          | 14.04   |
| Outlier region (%)                          | 0.31    |

---

**Supplementary information, Table S2. Crystallographic Data collection and Refinement Statistics***ToCsm1<sub>crys</sub>-2ATP***Data collection**

|                             |                          |
|-----------------------------|--------------------------|
| Beamline                    | SSRF BL-19U              |
| Space group                 | C2                       |
| Cell dimensions             |                          |
| a, b, c (Å)                 | 158.20, 55.24, 92.95     |
| $\alpha, \beta, \gamma$ (°) | 90, 99.44, 90            |
| Resolution (Å)              | 46.39-1.69 (1.75-1.69) * |
| I/ $\sigma$ I               | 15.3 (8.1)               |
| R <sub>pim</sub>            | 0.044 (0.102)            |
| Completeness (%)            | 99.22 (94.02)            |
| Redundancy                  | 6.7 (6.4)                |

**Refinement**

|                             |              |
|-----------------------------|--------------|
| Resolution (Å)              | 1.69         |
| No. reflections             | 88086 (8282) |
| Rwork / Rfree               | 0.184/0.209  |
| Protein residues            | 721          |
| No. atoms                   |              |
| ligands                     | 62           |
| Solvent                     | 973          |
| B-factors (Å <sup>2</sup> ) |              |
| Protein                     | 15.99        |
| Ligands                     | 12.37        |
| Solvent                     | 27.96        |
| R.m.s. deviations           |              |
| Bond length (Å)             | 0.008        |
| Bond angles (°)             | 1.26         |
| Ramachandran plot           |              |
| Favored region (%)          | 97.75        |
| Allowed region (%)          | 2.25         |
| Outlier region (%)          | 0.00         |

\*Highest resolution shell is shown in parentheses.
